1 **Research article**

2

3

4 **Combined severe-to-profound hearing and vision impairment –**  
5 **experiences of daily life and need of support, an interview study.**

6

7

8 Satu Turunen-Taheri <sup>1,2,3</sup>, Annica Hagerman Sirelius <sup>3</sup>, Sten Hellström <sup>1,2</sup>, Åsa Skjönsberg <sup>2,3</sup>  
9 and Gunnel Backenroth <sup>4</sup>

10

11

12

13 <sup>1</sup>Department of CLINTEC, Division of Ear, Nose and Throat Diseases, Karolinska Institutet,  
14 Stockholm, Sweden

15 <sup>2</sup>Department of Audiology and Neurotology, Karolinska University Hospital, Stockholm,  
16 Sweden

17 <sup>3</sup>Department of CLINTEC, Division of Audiology, Karolinska Institutet, Flemmingsberg,  
18 Sweden

19 <sup>4</sup> Stockholm University, Department of Psychology, Stockholm, Sweden

20

21

22

23 \* Corresponding author:

24 Satu Turunen-Taheri, Department of Audiology and Neurotology, Karolinska University  
25 Hospital, SE-118 95 Stockholm, Sweden, [satu.turunen-taheri@ki.se](mailto:satu.turunen-taheri@ki.se)

26 <http://orcid.org/0000-0002-3271-250X>

27

28 All authors contributed equally to this work.

29

## 30 **Abstract**

31 **Objectives** The purpose of the present study was to describe experiences of disabilities  
32 and factors affecting daily life from the perspective of adult persons with severe-to-profound  
33 hearing impairment in combination with severe vision impairment. Furthermore, the study  
34 also investigated which kind of support individuals with dual sensory loss received, and their  
35 experiences as citizens in the society.

36 **Methods** Semi-structured qualitative interviews were performed, analyzed, and  
37 categorized using content analysis.

38 **Results** Fourteen interviews were performed, with equal number of both sexes. Mean age  
39 was 70.1 years (47-81 years). Analysis of the data resulted in 22 categories, six sub-themes  
40 and two main themes. Two main themes emerged as *Isolation* and *The Ability to control one's*  
41 *own daily life*. Surprisingly, most of the participants did not think of their vision and hearing  
42 impairment as a combined disability. The interviews showed various kind of strategies to  
43 handle daily life. The Deafblind-team unit was reported to offer excellent health care.  
44 Companion services for persons with disabilities proved to have become more difficult to get  
45 support from and created lack of independence and control over their own lives. However, it  
46 was also obvious that the participants felt a positive outlook on life and more solution-  
47 oriented in order to adjust their everyday life to their life-situation.

48 **Conclusions** The combination of vision and hearing impairment demonstrated isolation,  
49 and the respondents in the study have a need of support in everyday lives. At the same time,  
50 they struggle to have the ability to control their own lives.

## 51 Introduction

52 Hearing impairment affects everyday life in communication, and it is associated with health  
53 conditions such as social functioning, and mental health [1]. The global burden of hearing loss  
54 is a third leading cause of years lived with disability [2]. In Sweden, approximately 18.3%,  
55 corresponding to 1.5 million people over 16 years age report hearing loss of varying degrees  
56 [3] (estimation: <http://www.statistikdatabasen.scb.se/sq/73088>). The estimated prevalence of  
57 adult patients with severe-to-profound hearing impairment is approximately 0.28%,  
58 corresponding to 22.000 of the population in Sweden [4, 5].

59 The common method to estimate hearing loss is assessing of hearing thresholds with a pure-  
60 tone audiometry (PTA) using four frequencies for the pure-tone-average (PTA4: 500, 1000,  
61 2000 and 4000 Hertz) [6]. There are different classifications of hearing impairment and  
62 according to the WHO the degree of hearing loss [7] see [Figure 1](#). In 2021, WHO revised the  
63 classification and grades of hearing loss, but this study used the previous variant of  
64 classification.

65

66 **Fig 1. Grades of hearing impairment, World Health Organization (WHO) 1991.**  
67 Audiometric ISO value = The average of hearing level (HL) at 500, 1000, 2000 and 4000 Hz in the best ear.  
68 With permission from WHO to use the table below. Available from:  
69 [https://apps.who.int/iris/bitstream/handle/10665/58839/WHO\\_PDH\\_91.1.pdf?sequence=1&isAllowed=y](https://apps.who.int/iris/bitstream/handle/10665/58839/WHO_PDH_91.1.pdf?sequence=1&isAllowed=y)

70

71 Vision impairment has a strong negative impact on daily activities and social participation [8]  
72 and increased functional disability [9]. A recent study from Blindness and Vision Impairment  
73 Collaborators (GBD) [10] estimates the global prevalence of blindness to 43.3 million people,  
74 and moderate to severe vision impairment in 295 million people. Approximately 445.000  
75 people in Sweden has by definition some kind of vision difficulties [3]. However, there is no

76 comprehensive registration of persons with vision impairment in Sweden, but approximately  
77 100.000 people are handled through a Low Vision Clinic, as called ‘Syncentralen’, due to  
78 severe vision loss [11].

79 Vision impairment is defined in four levels: mild, moderate, severe and blindness in the  
80 International Classification of Diseases-11 [12] and the classification of vision impairment  
81 according to WHO [13] shows in [Figure 2](#).

82

83 **Fig 2. Classification of vision impairment including blindness, World Health Organization (WHO) 2019.**

84 With permission from WHO to use the table below. Available from: [https://icd.who.int/browse11/l-](https://icd.who.int/browse11/l-m/en#/http://id.who.int/icd/entity/1103667651)  
85 [m/en#/http://id.who.int/icd/entity/1103667651](https://icd.who.int/icd/entity/1103667651)

86

87 One disability, such as hearing loss, affects communication and could be associated with  
88 reduced quality-of- life (QoL) [14]. A dual sensory loss, i.e., both hearing and vision loss,  
89 affects even more everyday functioning and ability to communicate [15]. Globally, estimation  
90 of the population of persons living with deafblindness is 0.2-2% [16]. A combined severe-to-  
91 profound hearing loss and severe vision loss seems to have more negative impact on patients’  
92 daily life, e.g., anxiety and depression scores are higher compared to severe-to-profound  
93 hearing loss alone [17].

94 The Swedish Association of the Deafblindness [18] states; “Deafblindness is a combined  
95 vision and hearing impairment of such severity that it is hard for the impaired senses to  
96 compensate for each other. Thus, deafblindness is a distinct disability” [19] (page 1).

97 In 2006, approximately 1200 people were characterized as deafblind in Sweden [20]. A  
98 recently published study [21] shows a prevalence of ~ 1581 (0.08 %) individuals over 65  
99 years old with a combination of vision and hearing impairment in Sweden. According to  
100 another source [22] approximately 2000 people up to 65 years of age are deafblind in Sweden

101 2018, of which approximately 400 were born deafblind and almost 700 persons are affected  
102 by Usher Syndrome. Usher syndrome is the most common cause of deafblindness [23] which  
103 is an inherited autosomal recessive disorder with hearing loss at birth and progressive retinitis  
104 pigmentosa (RP). The prevalence of Usher has been estimated between 1-4/25.000 people in a  
105 worldwide population [24]. In Sweden, the prevalence of Usher for all three clinical types of  
106 syndrome is estimated to 3.3/100.000 [25].

107 Hearing health care organization differs in the arrangement between different regions and  
108 county councils in Sweden. Three types of hearing health care practice can be found:  
109 traditional “public”, primary authorized “private but publicly funded” and “completely  
110 private” [26]. All three types of care exist in Stockholm. Primary authorized clinics take care  
111 of patients with mild to moderate hearing loss. Furthermore, the traditional public clinic at  
112 Karolinska University Hospital, separately for children and adults, provides care to patients  
113 with severe-to-profound hearing loss or combined sensory loss.

114 Similar to hearing health care, the structure of the vision health care differs between regions  
115 and county councils in Sweden. Optician stores can be compared with primary authorized  
116 clinics for hearing. The optician refers patient to a doctor if a vision disease is suspected [27],  
117 and a doctor can refer patients to a Low Vision Clinic, which offers habilitation and  
118 rehabilitation for all age groups of patients with vision loss [11].

119 In Sweden, specialized care for deafblind persons is offered in the Counselling and Support  
120 team for persons with deafblindness, also called “Deafblind-team unit” [28]. They work  
121 interdisciplinary and offer a care plan, lectures, group activities, and support in contact with  
122 e.g., various authorities, communication training and conversation support, home visit, and  
123 training with white cane. The deafblind-team unit also support family members. In Sweden,  
124 no referral is required to access the deafblind-team unit, however, it is required that patient

125 has contact with both Low Vision Clinic as well as the unit for extended hearing rehabilitation  
126 for adults e.g. at Karolinska University Hospital, and thus fulfils the criteria required for these  
127 activities [28].

128 The Swedish Agency for Participation (MFD) [29] works for people with disabilities to have  
129 the right to live an independent life and to be able to participate in society on equal terms as  
130 everyone else. Availability is a general principle of the UN Convention on the Rights of  
131 Persons with Disabilities [30], both in terms of the physical environment and information and  
132 communication. Disability such as deafblindness causes serious consequences that affect the  
133 possibility of activity and participation on several levels and when the environment can be  
134 adapted to the needs, the possibility of participation increases [31].

135 Swedish Agency for Accessible Media (MTM) [32], belonging to the administration of the  
136 Ministry of Culture, produce and distribute audio books, information, literature and news in  
137 easy-to-read Swedish. They make sign language literature accessible and provide support to  
138 newspapers transferred to speech.

139 Patients with hearing loss need an individualized care plan and various types of audiological  
140 rehabilitation such as technical rehabilitation and extended audiological rehabilitation.  
141 Technical rehabilitation includes hearing aids, cochlear implants, and other technical devices  
142 such as connection to smartphones, hearing-loops with telecoil in hearing aid and FM-system.  
143 Patients with severe-to-profound hearing loss needs extended audiological rehabilitation with  
144 more support with medical, psychological, social and educational care [33]. Backenroth and  
145 Ahlner [34] reported on the quality-of-life in a group of persons with moderate to severe  
146 hearing loss (n=30; mean age=49.1 years) who had participated in an audiological  
147 rehabilitation program at the Department of Audiology, Karolinska Hospital. Participants in  
148 the rehabilitation program had learned different coping strategies for their own life situation.

149 Some of the conclusions of the study were that audiological counselling interventions need to  
150 increase the insight in one's own coping strategies, actively involve family members in the  
151 counselling, have more focus on psychosocial working through of emotions and relations,  
152 influence the QoL of the hearing-impaired person at the workplace, in short, to have an  
153 increased holistic psychosocial perspective to audiological rehabilitation. A recent study by  
154 Turunen-Taheri et al [35] showed the importance of extended audiological rehabilitation,  
155 group rehabilitation and visits at a hearing rehabilitation educator especially for patients with  
156 severe-to-profound hearing impairment.

157 Similarly, patients with vision impairment need support and efforts with habilitation and  
158 rehabilitation that prevents and reduces the difficulties that various forms of vision  
159 impairment can bring in daily life. A recent study by Ehn et al [36] shows various life  
160 strategies that persons with deafblindness can have by resolving and preventing to handle  
161 challenges. Patients need technical devices to manage their everyday lives such as various  
162 models of pocket memories, daisy players, magnifying glass, reading TV, reading machine  
163 (scans typed text and read it up with a speech synthesis), binoculars, Braille display, visual  
164 interpretation, and tactile wristwatch [37].

165 In Sweden, the Social Services Act (2001:453) [38] ensures that people with disability receive  
166 support in chapter 5, in § 7: "The Social Committee shall work to ensure that people who, for  
167 physical, psychological or other reasons, encounter significant difficulties in their way of life,  
168 have the opportunity to participate in the community of society and to live as others".

169 Companion service is for those persons who, because of their disability, needs help to  
170 participate in recreational and cultural activities. The purpose is for example to make it  
171 possible to meet friends, participate in cultural and community activities and exercise sports  
172 activities [39]. In a report from the Swedish National Board of Health and Welfare

173 (Socialstyrelsen) [40] it appears that companion service is an activity that may support people  
174 with disabilities to simplify becoming involved in society.

175

176 The overall aim of this study was to describe experiences and factors affecting daily life in  
177 adult patients with severe-to-profound hearing impairment combined with severe vision  
178 impairment. Furthermore, the study also investigates which kind of extended rehabilitation  
179 and support patients with dual sensory loss received, and their experiences of being part of the  
180 society.

181

## 182 **Materials and methods**

183 The study is designed with a qualitative approach to increase understanding the content [41]  
184 by use of semi-structured interviews describing the impact, consequences and experiences of  
185 combined severe-to-profound hearing loss and severe vision impairment in daily life, and the  
186 support of extended audiological rehabilitation these patients need.

### 187 *Method considerations*

188 Qualitative research with interviews aims to describe, explore, and explain the individual  
189 participants' experiences on a deeper level, as for the aims of the present study, experiences  
190 and factors affecting daily life in patients with dual sensory loss. To organize and analyse the  
191 data collected, the qualitative inductive content analysis were conducted in the study by  
192 creating codes, categories and themes [41, 42].

### 193 *Selection and inclusion criteria*

194 Recruitment of participants who meet the inclusion criteria: severe-to-profound hearing loss  
195 at 61 dB HL or more in the best ear [7] in combination with severe vision impairment, were



196 performed in 2018-19 in consecutive patients with self-selection. Patients were seeking care  
197 at the County Council in Stockholm at the Department of Audiology and Neurotology,  
198 Extended Hearing Rehabilitation, Rosenlund, Karolinska University Hospital, Stockholm and  
199 at the Counselling and Support team for persons with deafblindness so called the Deafblind-  
200 team unit, at Sabbatsbergs Hospital, Stockholm, Sweden.

201 To be included in the present study, patients had severe vision impairment to blindness, and  
202 severe-to-profound hearing impairment according to WHO previous grades of hearing  
203 impairment (Figure 1). Even patients depending on a sign language or tactile sign language  
204 interpreter were included.

205 The researchers conducting the interviews informed their colleagues at the units about the  
206 study and were asked to recruit patients to participate in the study. The authors did not contact  
207 the patients themselves in order to not influence their decisions to participate in the study.

208 The study included 14 patients from Stockholm County council. Seven males and seven  
209 females participated in the interviews. The age ranged between 48 to 81 (mean 70.1) years  
210 (Table 1). Seven of the participants were recruited through Karolinska University Hospital  
211 and seven through Sabbatsbergs Hospital. All participants had participated in audiological  
212 rehabilitation at the Department of Audiology and Neurotology, Extended Hearing  
213 Rehabilitation Rosenlund, Karolinska University Hospital.

214 **Table 1.** Demographic data. Gender, age, hearing and vision loss distribution of the interview patients

| Characteristics |       |     |       |
|-----------------|-------|-----|-------|
| Gender          | Women | Men | Total |
| Age             |       |     |       |
| 41-50           | 1     | 1   | 2     |
| 51-60           | 1     |     | 1     |
| 61-70           |       | 3   | 3     |
| 71-80           | 4     | 1   | 5     |
| 81-90           | 1     | 2   | 3     |
| Total           | 7     | 7   | 14    |

|                                                         |                |                |              |
|---------------------------------------------------------|----------------|----------------|--------------|
| Mean age (year)                                         | 70.8           | 69.4           | 70.1         |
| Hearing loss PTA <sup>4</sup><br>best ear, mean (range) | 69.4 (60-95)   | 75.1 (68-91)   | 72.2 (60-95) |
| Vision loss, severe <sup>2</sup>                        | 3              | 3              | 6            |
| Blindness, total                                        | 4 <sup>3</sup> | 4 <sup>4</sup> | 8            |

215 <sup>1</sup>Hearing loss PTA<sup>4</sup> means the average of hearing level (HL) at 500, 1000, 2000 and 4000 Hz in the best ear.

216 <sup>2</sup>Severe vision loss as, for example, caused by Usher II, retinitis pigmentosa, glaucoma, keratoconus, macular degeneration.

217 <sup>3</sup>One participant is blind at one eye and severe vision loss in the other eye. One participant can only see dark and light.

218 <sup>4</sup>One participant is blind at one eye and severe vision loss in the other eye.

219

## 220 *Data collection*

221 Face-to-face interviews were conducted in Swedish by two of the authors (STT and AHS) at  
222 the unit of Extended Hearing Rehabilitation, unless the patient wanted to meet in another  
223 place, such as the home environment or their workplace. Thirteen interviews were performed  
224 at the hospital and the remaining one at the patient's workplace. A semi-structured interview  
225 guide ([Supplementary material](#)) was used but participants were also given an opportunity for  
226 deeper discussions and encouraged to open dialogue. Prior to the investigation, the interview  
227 guide was pre-tested on a test interview with one patient having moderate to severe hearing  
228 loss and severe vision loss. The pre-interview led to that some added questions. Both  
229 interviewers (STT and AHS) participated in each interview, one as the active conversation  
230 leader and the other observed the interview and wrote field notes. The interviewer and the  
231 observer switched the roles every second interview section. Interviews were audio recorded  
232 with a digital Dictaphone.

233 The interviews were performed in a quiet room with the possibility for the participants to  
234 listen by a hearing-loop while the interviewer talked in a microphone. One of the interview  
235 sessions did not have access to t-loop due to technical problems. The interview at the  
236 participant's workplace was performed in a coffee room. In three of the interview sessions, a  
237 companion service person participated in the interview session, and one of those was a

238 relative. No interpreter was present in any of the interviews. The authors were allowed to  
239 record the interviews on audio recorders.

240 All interviews were transcribed verbatim in Swedish, which means that all verbal and  
241 nonverbal [e.g., coughs] utterances and pauses were transcribed. The interview times lasted  
242 between 41-120 minutes, totally 995 minutes for all 14 interviews. Transcription was done by  
243 a person outside the study. Both authors STT and AHS listened through the recordings  
244 afterwards. The transcribed text was read through several times by two authors (STT and  
245 AHS). For quality control purpose, one of the authors (ÅS) listened to all interviews and took  
246 ongoing notes of the interviews. The authors (GB and SH) controlled all transcribed texts.  
247 Each participant received their own transcribed text by mail or email.

#### 248 *Data analysis*

249 Interviews were analysed and categorized using content analysis. Content analysis is defined  
250 as “a research technique for making replicable and valid inferences from texts (or other  
251 meaningful matter) to the contexts of their use” [42] (page 24). The present study used  
252 inductive content analysis describing interview areas with open coding [43], formulating  
253 codes with condensed meaning units [44], analysing texts into categories [42], sub-categories,  
254 codes and themes [44, 45].

255 The process was performed in phases. The written data and audio material was listened to and  
256 read through several times. The content analysis was performed at first by two of the authors  
257 (STT and AHS) together, and thereafter with four of the authors (STT, AHS, ÅS and GB)  
258 together. The fifth author (SH) has read the transcribed texts. The analysis was discussed  
259 among the researchers. The meaning units were identified to codes and categories. Coding  
260 was regularly reviewed by the research team (STT, AHS, ÅS and GB) to identify and  
261 incorporate emergent themes. The data were then examined by author STT and author AHS to  
262 identify typical quotes and common reasoning.

263 The selected quotes texts for manuscript were translated from Swedish to English. For the  
264 reader's sake, the translated texts have been grammatically written in English and we used  
265 "text [...] text" if any sentence were uncompleted.  
266 To consider transferability, trustworthiness, credibility, reflexivity, and confirmability, four  
267 authors (STT, AHS, ÅS and GB) checked the elaborated findings for relevance while  
268 carefully considering the meaning units and clustering before finalising the categorisation and  
269 themes [46-48].  
270 The authors followed the phases of Braun and Clarke [49], and also creating categories as  
271 many researches describe for inductive content analysis [43, 45] see revised model [Figure 3](#).  
272 The authors have followed gold standards [50] and the consolidated criteria for reporting  
273 qualitative research (COREQ) [51]. The text was coded and categorized to find meaningful  
274 structures. Participants were named as P1-P14. Every code were labelled with the individual  
275 marking by P1:1:1 or P1:1:a:1 which signifies an own identity for each quote. First digit is  
276 participant's number, second digit describes category, third digit is for the quotation's serial  
277 number, and an eventual small letter corresponds to a sub-category. All authors evaluated  
278 codes, categories and sub-themes and theme to obtain the consensus.

279

280

281 **Fig 3. Phases of data analysis in the study.**  
282 Revised model in the present study based on Braun and Clarke analysis (2006).  
283

### 284 ***Ethical considerations***

285 This study was approved by the Regional Ethical Review Board, Stockholm (2014/2101-31).  
286 All patients were provided with both written and verbal information before they were  
287 included in the study.

288 According to the ethical guidelines, the original ethical consent did not include the question of  
 289 citation use, why participants afterwards were asked for the consent that applies to the use of  
 290 quotes from the interview. The quotes were anonymous so they cannot be coupled to a  
 291 specific individual. Three participants refrained from accepting the consent for the use of their  
 292 quotes, hence their responses have been deleted from the quotes.

293

## 294 **Results**

### 295 *Demographic data*

296 In total, 14 interviews were performed, with equal numbers from both sexes. The data  
 297 analysis resulted in 20 categories, six (6) sub-themes and two (2) main themes that are  
 298 presented below. The abstraction of categories, sub-themes, and the main themes are shown in  
 299 [Table 2 and Figure 4](#).

300 **Table 2.** Themes, sub-themes, and categories based on conversations areas.

| Themes                                      | Sub-themes       | Categories                                                                                                                                                                                       |
|---------------------------------------------|------------------|--------------------------------------------------------------------------------------------------------------------------------------------------------------------------------------------------|
| Isolation                                   | Contact arenas   | <ul style="list-style-type: none"> <li>○ Professional network (Hearing Health Care, Low Vision Clinic, Deafblind-team unit)</li> <li>○ Family network</li> <li>○ Daily social network</li> </ul> |
|                                             | Time perspective | <ul style="list-style-type: none"> <li>○ Life history</li> <li>○ Current situation</li> <li>○ Future</li> </ul>                                                                                  |
|                                             | Disability       | <ul style="list-style-type: none"> <li>○ The Combinations's effects (hearing and vision loss)</li> <li>○ Possibilities</li> <li>○ Limitations</li> </ul>                                         |
| The ability to control one's own daily life | Challenges       | <ul style="list-style-type: none"> <li>○ Communication barriers</li> <li>○ Information to the environment</li> <li>○ Demands</li> </ul>                                                          |

|  |                   |                                                                                                                                                                                               |
|--|-------------------|-----------------------------------------------------------------------------------------------------------------------------------------------------------------------------------------------|
|  |                   | <ul style="list-style-type: none"> <li>○ Emotions</li> <li>○ Self-image</li> <li>○ Social competence</li> </ul>                                                                               |
|  | Needs             | <ul style="list-style-type: none"> <li>○ Continuity in professional network</li> <li>○ Availability</li> <li>○ Technical tools (including White cane)</li> <li>○ Companion service</li> </ul> |
|  | Coping strategies | <ul style="list-style-type: none"> <li>○ Cognitive</li> <li>○ Emotional</li> <li>○ Problem focused</li> </ul>                                                                                 |

301

302

303 **Fig 4. Interview areas in the study resulted in six sub-themes and 20 categories.**

304 The abstraction of sub-themes and categories.

305

306 Causes of hearing loss for this study population were e.g., noise trauma, hearing loss since

307 birth and/or childhood, Meniere’s disease, Usher Syndrome. The average of hearing

308 thresholds was PTA4 for right ear 75.21 dB HL and for left ear 76.00 dB HL. PTA4, *best* ear,

309 for females were 69.42 dB HL and for males 75.14 dB HL ([Table 1](#)).

310 Causes of vision impairment for the study population varied and were Usher Syndrome,

311 keratoconus, retinitis pigmentosa, external damage to the eyes in childhood, congenital

312 blindness, glaucoma, rheumatism in childhood, incubator treatment at birth, and macular

313 degeneration. Six participants had severe vision loss and eight was totally blind (two of them

314 in one eye and with severe vision loss in the other eye) ([Table 1](#)).

315 In three cases, the hearing impairment was the first impairment from birth and in three cases

316 the vision impairment existed from birth, and the remaining eight participants acquired

317 disabilities in childhood or later in life.

318

319 ***The main themes***

320 The qualitative content analysis of the categories and sub-themes formed in two main themes  
321 “*Isolation*” and “*The ability to control one’s own daily life*”. These main themes emerged  
322 from the six sub-themes presented below ([Table 2](#)).

323

324 ***Sub-themes***

325 Six sub-themes: *Contact arenas, Time perspective, Disability, Challenges, Needs, Coping*  
326 *strategies*, emerged from 22 categories.

327

328 ***Categories***

329 The following 22 categories were identified; Professional network (such as Hearing Health  
330 Care, Low Vision Centre, Deafblind-team unit), Family network, Daily social network (such  
331 as colleagues, association life, leisure activity groups), Life history, Current situation, Future,  
332 the Combination's effects (hearing and vision loss), Possibilities, Limitations, Communication  
333 barriers (such as Others (mis)understanding/attitudes, Own (mis)understanding/attitudes),  
334 Information to the environment, Demands, Emotions, Self-image, Social competence,  
335 Continuity in professional network, Availability, Technical tools (such as for hearing and  
336 vision impairment, and separately White cane), Companion service, and Cognitive, Emotional  
337 and Problem focused strategies ([Figure 4, Table 2](#)).

338

339 Here follows a summary of the sub-themes that emerged to the two main themes.

340 **Sub-theme: Contact arenas**

341 The categories *Professional network (including Hearing Health Care, Low Vision Clinic and*  
342 *Deafblind-team unit), Related persons and Colleagues* represent different **Contact arenas** the  
343 participants have.

344 In general, the participants were satisfied with the care they have received and the support that  
345 the medical team provided. They were properly taken care of.

346 However, participants could comment on *the Hearing Health Care* that:

347 “... *but it feels somehow that, uh, one is using county council's funds, money*  
348 *and resources...*” (P1, male)

349 “*Yes I know Hearing health care exist and it has been great and so with the Low*  
350 *Vision Clinic as well. A great support and help in my experience*” (P12, female)

351 “*Eh, yes there has been more changes in staff lately. Well, then one was unsure*  
352 *and wondered which audiologist one will meet... I think it has been working well and feels*  
353 *under control and I have felt safe*” (P14, male)

354

355 There are some re-occurring issues in need for improvement. Some based on very long  
356 waiting time to get an appointment and some logistical issues. There was also a request for  
357 more time needed to explain the use of all technical aids. Most participants commented on the  
358 long waiting time before receiving care at *the Low Vision Clinic* at which there is also a need  
359 of more employees.

360 “*Yes, it is rather positive. Eh I think well, it is like the same there, they are hard*  
361 *to get appointment at \* laugh \*, it takes time. Very long time*” (P1, male)



362                   *"It's a little tricky to reach there, or up to that floor. There are many levels ...*  
363 *so it is good most of the times, but it takes an incredibly long time between appointments"*  
364 (P2, female)

365                   *"... lack of personnel. That leads to very long waits ... Yes, it is more staff. That's*  
366 *what they need. That is the most important thing"* (P6, male)

367                   *"Visiting hours is too short. They give people technical aids, now I don't talk*  
368 *about myself, and people go home with them in boxes and haven't a clue how to use them"*  
369 (P10, female)

370

371 All participants only had positive statements to say about *the Deafblind-team unit*, at which  
372 patients felt involved in their care, staff owned high-level of competence and a special  
373 understanding of the patient and their needs. Participants also felt they were well informed  
374 and involved in their own care which is very important to create trust. They felt they were met  
375 with care and always understanding by all staff members:

376                   *"And eh the Deafblind-team unit serves as my second home ... I got a new life*  
377 *after I got in touch with them"* (P4, female)

378                   *"From the deafblind-team unit the effort is excellent"* (P5, female)

379                   *"Yes they have the knowledge ... they have understanding ... One gets a lot of*  
380 *empathy"* (P14, male)

381

382 The importance of *Family network* is shown in several quotes. It is emerged that sometimes  
383 participants had to remind relatives that they hear and/or see poorly, and in some cases, the  
384 closest ones could be the ones who showed the least understanding of all.

385                   “... for me it is well arranged because I have a husband who helps a lot at home  
386 such as vision interpretation and all that with document and finances and, uh, and that I do  
387 ask about food recipes and so on” (P2, female)

388                   “Then I need to burden my friends, but it works, it works to a certain limit” (P6,  
389 male)

390                   “... the world is starting to fall apart. Mhm. So I don't have the network I want”  
391 (P10, female)

392

393 The category *Daily social network* such as *colleagues* shows that workplace adaptations are  
394 required for a person with vision and hearing impairment. This can apply, for example, marks  
395 where stairs are located, and contrasts with colour to make it easier to see differences of  
396 levels. It is important that colleagues in the workplace address themselves using their name  
397 when they talk to someone with a severe vision impairment in order to rule out the insecurity  
398 that can occur when you don't know who you are talking to.

399                   ” *New environments are really hard for me, eh, but then I have my work*  
400 *colleagues, they help me all the time ... Or when I come into the copy machine room, there is*  
401 *also a person saying 'hello P5, this is M...'” (P5, female)*

402

403 **Sub-theme: Time perspective**

404 The categories about *Life history*, *Current situation*, and *Future* formed sub-theme **Time**  
405 **perspective.**

406 Many participants perceived *Future* as more threatening rather than safe. The future appears  
407 unhelpful, depressing, isolating, with anxiety. Some participants wish for progress in

408 ophthalmic surgery. It could for example be manifested by being afraid of getting a much-  
409 worsened hearing or vision impairment.

410 *"Yes, is there any future for me in my situation? ... It feels hopeless"* (P4,  
411 female)

412 *"No, but it is, progress is also being made when it comes to eye surgery. It is my  
413 hope, as I said, perhaps I can get a little better vision in the future"* (P6, male)

414 *"I have accepted that I suffer from this... But for me, I have the premise that I'm  
415 grateful every morning I wake up and I'm grateful that I still have some vision left"* (P9, male)

416 *"Yes, I think so because it is downright depressing. Accordingly, it is isolating"*  
417 (P10, female)

418 *"Yes, of course one hopes that one will get the vision back, but it is clear that it  
419 will not happen"* (P13, male)

420 *" Yes, I struggle with a lot of anxieties and worries \*pause\* I have not much  
421 positive thoughts...one rather take one day at the time and seize the day"* (P14, male)

422

### 423 **Sub-theme: Disability**

424 *The Combination's effects* by a simultaneous hearing and vision loss, *Possibilities*, and  
425 *Limitations* formed sub-theme **Disability**. Most participants had not realized that they have a  
426 combination of disabilities, more likely they thought of two separate disabilities independent  
427 of each other. Some participants with congenital blindness, emphasized the great importance  
428 of hearing that remained. Some participants, on the contrary, had the experience that it was  
429 the vision loss that was the cause of the isolation. One participant mentioned that not until  
430 he/she no longer could read from other people's lips or see the body language, he/she

431 discovered that he/she suffers from a combination of disabilities. The *combination's effects* of  
432 disabilities limit and isolates the independence, for example, to go out without a companion:

433 *"No, but that is that I have not thought about it as much as a combination so*  
434 *that sometimes it is difficult from the vision point of view, and sometimes it is difficult from a*  
435 *hearing point of view and eh I have not thought of it clearly that it is just the combination that*  
436 *makes it extra difficult ... then because I have not thought so much about it that I both see and*  
437 *hear poorly and I have seen more that sometimes there are vision problems and in other*  
438 *situations hearing problems"* (P1, male)

439 *"For the vision impairment, I had learned how to deal with... then this second*  
440 *thing came and made trouble. Because if you are 'only' vision impaired then you are using the*  
441 *hearing to locate yourself... Yes, it is not a fun combination!"* (P4, female)

442 Many participants mentioned difficulties such as ability to orient oneself and move in various  
443 environments.

444 *"It isolates me. In particular, if I saw a little earlier, I could at least go out on*  
445 *myself. Because, then hearing was not an obstacle. It was not. But with the combination then,*  
446 *I am isolated in that way. I depend on people constantly to be able to come outdoors."* (P10,  
447 female)

448 *"Yes. It is not easy to adapt, I think. That, it has decreased gradually, you may*  
449 *say with the hearing as well.... it is the loss of hearing that has the greatest impact, leading so*  
450 *that I need more help really"* (P12, female)

451 *"Yes, unfortunately I have become more isolated because of the vision*  
452 *impairment now during the last 15 years. And it has also made me more frustrated and*  
453 *irritated. For example, you stumble upon things on... and you need more support... but even*

454 *there when you have difficulties, you can no longer use lip reading. It makes me feel the need*  
455 *to have a good hearing aid. ...But again, this means that you become more isolated, you are*  
456 *better off and safer at your own home” (P14, male)*

457

458 Some participants may see their vision and hearing impairment as an asset as, for example,  
459 becoming more detailed in what they are doing or that another sense can be strengthened as a  
460 resource in *Possibilities*:

461 *“I guess I never... .thought of that oh, now I can not do this because I both see*  
462 *and hear badly. Of course, there are things I can not do because of this combination of*  
463 *disabilities. But eh, it's hard to figure out what it would be \*laughs\*” (P1, male)*

464 *” But I'm thinking of 'Yes, this is as usual. This is what I'll do' and then I stand*  
465 *there and “Oh, I do not hear this, I do not see this, but I will participate”. (P4, female)*

466 *“I am very careful and because one has such a limited field of vision it leads to*  
467 *that I do not miss anything usually \*laugh\*. I am very neatly, and it takes some time but I am*  
468 *very careful and systematic...” (P5, female)*

469 *“Because when we meet through various associations. Then I meet a lot of*  
470 *people but then I have an interpreter. Whom I book. This person is then my eyes and ears”*  
471 *(P14, male)*

472

473 The participants reported a lot about *Limitations* in their lives. There were difficulties in being  
474 able to move and orientate oneself, being in danger in traffic, not being able to shop, not being  
475 able to read, not being able to drive a car, being dependent on other people, and not have the  
476 freedom to do what you want. Some have been able to take the municipal subway or bus in

477 the past, but don't dare to do so anymore. Public transport has many physical and social  
478 barriers to overcome such as platform gaps, inadequate travel information and noise. Here are  
479 some of many limitations that are addressed:

480 *"Other changes concern of course the daily newspaper reading eh is not at all*  
481 *in the same way, it is a big difference, even though my wife then reads for me, it becomes*  
482 *limited due to what she thinks is interesting then ..."* (P1, male)

483 *"And it's really very important to keep active, uh, because you can't move as*  
484 *much as others when you don't see ... And of course, it's difficult to communicate and hear*  
485 *them at the same time. Uh, so you feel very, very lonely in your surroundings ... you are so*  
486 *dependent to have a person on your side, one's side, in many situations ..."* (P2, female)

487 *"The combination only causes problems"* (P4, female)

488 *"How does it affect my everyday life? Continuously"* (P5, female)

489 *"This being able to read, it's tricky, I can't do it. I don't even see what the names*  
490 *of the magazine are ... Oh, so we run through the week's mail and such. And bills and things*  
491 *like that"* (P6, male)

492

493 Many raised the need for companion service and commented upon the limitations and  
494 restrictions of this service being reduced in time. Some participants mentioned the lack of  
495 feeling of freedom to be able to do things they wanted without the help of others. Most  
496 participants address the lack of being able to go and buy their food all by themselves.

497 *"... But then it was good to have companion service too ... But the limitations are*  
498 *notable of course, yes. That you do not have that independence to do things spontaneously"*  
499 (P9, male)

500                   *“There are limitations when you can't go out on your own. But, I need help, that*  
501 *is probably the biggest problem ... What is important to me, is actually to have companion*  
502 *service. And I get that. However, I need more companionship hours”* (P12, female)

503                   *“... When I go shopping myself. Because it is a gorgeous feeling, a freedom that,*  
504 *if you are thinking like a toddler, 'I can'. And for me it is important to try out, when I come to*  
505 *a grocery store and I go there and pick for myself...”* (P14, male)

506

### 507 **Sub-theme: Challenges**

508 Sub-theme **Challenges** emerged from six (6) categories:

509 Category *Communication barriers* demonstrated the importance of introducing oneself every  
510 time encountering a person who has severe vision impairment or is blind to avoid  
511 misunderstanding.

512                   *“So it's always, uh, I'd like to get an introduction every time I meet a person.*  
513 *It's so sad that you never know whom you meet unless the person says, 'Now comes Karin' or*  
514 *'Now comes that one and the other.'”* (P2, female)

515                   *“... Then we met a couple who stopped by and cheered and sounded so familiar,*  
516 *but I hadn't, I couldn't figure out whom it could be. And eh, I had then introduced myself well,*  
517 *then I asked my husband 'But with whom did we talk to?' Then it turned out that it was a*  
518 *couple that we had known for 40 years.”* (P4, female)

519                   *“... when I don't hear what they say. Then they get tired of talking to me. Then*  
520 *they turn to the companion service person. Or whoever is with me. So the situation can be so*  
521 *crazy and I feel so offended”* (P10, female)

522

523 There is a lack of understanding in communication with other persons, or neighbours leading  
524 to others or own (mis)understanding/attitudes:

525 *"Oh my husband sat opposite me and I wanted to talk towards him so I used*  
526 *sign language, and then the lady sitting next to me says 'I don't like you using the sign*  
527 *language because I get the feeling that you're talking about me'" (P4, female)*

528 *"Yeah, I felt like... I have always been told that the hearing impaired has a*  
529 *suspicious mind, when not hearing what others are talking about then you think they are*  
530 *talking about you. But I have never thought that even others can be suspicious"* (P4, female)

531

532 *Category Information to the environment* illustrates a relatively new way of informing that a  
533 person suffers from combined vision and hearing impairment – the use of a white cane with  
534 red markings.

535 *"... if I do not say hello to you, it is not because I am impolite, it is because I do*  
536 *not see you, so come up to me and say hello or pat on me. So, you can say hello"* (P5, female)

537

538 These disabilities cause fatigue and takes energy in many ways forming a sub-theme

539 *Demands:*

540 *"Well, they don't understand... that e, they say you are after all as usual. But*  
541 *you have no idea how much it costs to try to be as usual. It takes almost all energy ... So, I am*  
542 *always on tenterhooks. Oh, that also takes a lot of energy."* (P4, female)

543 *"...I had not energy enough to read a fairy tale to my children ... I had constant*  
544 *pain throughout my whole body. I had a headache, I had pain in my eyes but in some way, it*



545 *was the daily grid, this was ongoing, ongoing, how can I express myself ... That one was in*  
546 *pain all the time” (P5, female)*

547

548

549 Perceived sadness and sorrows could appear when participants cannot ski any longer or drive  
550 a car, which was discovered also in the category *Emotions*. Many participants had fears with a  
551 concern of decline in hearing or vision, and some mentioned to be scared near children not to  
552 hurt:

553 *So yes, regarding children of course. I never dare to go near to children*  
554 *because I am so scared to step on them, hm, yes ... So, I am also very scared of snow, uh,*  
555 *nowadays, although I used to like snow, skiing, and stuff like that before. Now I don't like it at*  
556 *all” (P2, female)*

557 *“Aa, but I hope that it will not worsen in any case with the vision so what I have*  
558 *left, will remain” (P13, male)*

559

560 *“So that, we really miss this very much that maybe not... keeping the car longer,*  
561 *when we had, we travelled a lot and looked around everywhere and I really do miss that.”*  
562 *(P13, male)*

563

564 In category *Social competence* were social skills described as very important to be able to  
565 move on in life and to get it in the best way is by spending time with other people.

566

567 Category *Self-image* shows that many struggles enormously, and they do not give up easily  
568 but want to prove that they can still manage their everyday life, even in a different way. One  
569 participant mentioned that he/she does not give up but wants to show that everything is  
570 possible for his/her own survival and to be a role model for others. Another participant wants  
571 to fend for himself as much as possible:

572 *"... I think most people do so. But I want to try to do as much as I can myself.*  
573 *It's a bit stubborn there too but... \*laugh\**" (P9, male)

574

#### 575 **Sub-theme: Needs**

576 Four categories appeared to sub-theme **Needs** which reflects different basic needs in daily  
577 life. Category *Continuity in professional network* showed the desire to be called when it is  
578 time to change hearing aids, just as the deafblind team invited their patients every year:

579 *"... for the Deafblind-team unit are somewhat a unique in that manner that they*  
580 *every year are calling you for an appointment to discuss the rehabilitation plan"* (P9, male)

581

582 Information regarding society issues takes place to a large extent today through TV, radio,  
583 internet, social media, mobile phones. This demands good vision and hearing. In the category  
584 *Availability* appeared many difficulties related to lack of the possibility to participate through  
585 media. This may lead to isolation if one does not get accessibility in society. Radio is  
586 perceived by many as a very good source of information.

587 *"Much is made for normal sighted people and normal hearing people"* (P2,  
588 female)

589 *"A lot is obtained by computer"* (P4, female)

590                   “... However, I know that with social medias it has been an incredible upswing.  
591 I get a lot more information today than I got a few years ago ... Eh, but, in particular social  
592 media, make me keep up with today’s news and global news in a different way than I did  
593 before” (P5, female)

594                   “The radio is probably presenting the best global news media channel ... as you  
595 get information about the whole world” (P6, male)

596                   “It is then through text TV. And eh internet. Eh, I have trouble to get  
597 information through the mailbox ... this with paper, it is, of course, and it is, you feel you hate  
598 to bother with paper...to connect with surrounding world...Yes then you really get isolated”  
599 (P14, male)

600

601 Participants have received various kinds of *Technical tools* for both vision and hearing  
602 impairment in their rehabilitation. Some quotes show about these aids:

603                   “...speech syntheses can only be, they cannot be perfect but you have to  
604 interpret slightly what they say ...” (P1, male)

605                   “...Yes, about walking around with a cane, it is also a circumstance that you  
606 have learned how to get along with cane” (P2, female)

607                   “And also, this with wind noise and, then you get very tired and irritated” (P14,  
608 male)

609

610 In the present study, the *White cane* seems to have a special important place but also showed  
611 the vulnerability with the cane. Many participants describe that it took time before they

612 became "friends" with their cane and that it required cane training for the technique. Some  
613 were ashamed in the beginning, someone was afraid to announce that you can rob her/him,  
614 but most of them mentioned the white cane as their most important aid.

615 *"But it was a big step from getting the cane to using it. It took me many years.*  
616 *... Oh, we – me and my child - meet an elderly lady who stopped right in front of us, just stood*  
617 *staring. Oh, then my child says 'What does that aunt look at Mommy?' 'She's probably looking*  
618 *at my cane' I said. "Then you have to choose, either me or the cane," the kid said. What do*  
619 *you choose? So, then it was ... Then I stopped using the cane. Because he/she was probably*  
620 *ashamed, or thought it was embarrassing... Now the cane is my most loyal companion"* (P4,  
621 female)

622 *"I mainly use this white cane in unknown surroundings or is walking in*  
623 *unknown surroundings, in the dark"* (P8, female)

624 *"Eh, a little sporadic at first, but now in these last years I always take my cane*  
625 *with me when I am leaving home. I think it's very good ... No, you should never underestimate*  
626 *that white cane. It has a great significance."* (P9, male)

627 *"And then now if I go outside and wait if I don't have the rollator ... then I don't*  
628 *fold my white cane at all to signal that here I stand and don't see. And that is because I do not*  
629 *want people to feel that I am an easy catch."* (P10, female)

630

631 The *Companion service* represents the important need for support for persons with dual  
632 sensory loss. This service proves to be a very important part of vision and hearing disabled  
633 lives. Eight of the 14 patients had support by the companion service in varying degrees. Two  
634 had companion service one (1) hour a week (4 hours per month), one had five hours per

635 month, one had 10 hours per month, two had 20 hours per month, one had 30 hours per  
636 month, and one had 40 hours per month. Six of the participants had no companion service at  
637 all at the time of the interviews, of whom at least four had closely related persons as support.  
638 Many participants mention a problem with the fact that lately the companion service hours  
639 have decreased compared to previously.

640 *“Uh, then I can add that now, I have companion service, 20 hours per month.*  
641 *They however reduced the hours, so I have been mentally cracked for a year....That’s it, and*  
642 *I’m not afraid to be addicted, I’m used to it. But there are limits to how much help I can get”*  
643 (P10, female)

644 *“It is the companion service that is important in fact, and these 20 hours are not*  
645 *always enough”* (P12, female)

646 *“The companion service is 5 hours a week....I try to take it coherent so we have*  
647 *time together do something substantial. Companion service adds more quality if you can get*  
648 *more coherent time together”* (P14, male)

649

## 650 **Sub-theme: Coping strategies**

651 The last categories; *Cognitive, Emotional and Problem focused strategies* emerged to sub-  
652 theme **Coping strategies**

653 Participants in the study have various *Strategies* showing resourcefulness and conformability.

654 Several participants expressed that hearing and vision disabilities resulted in various  
655 strategies. The strategi may be to strive for to try to live as normal as possible by using

656 problem focused coping strategies. One participant shared that he/she constantly saw

657 opportunities and adapted to his/her problems. Some participants used their creativity and

658 ingenuity in outdoors and sometimes a lot of planning was required the day before to be able  
659 to move to new places.

660 *“Yes, no, so I am not very shy, but when I think I need to solve a problem and*  
661 *there are some people nearby who seem to be able to help me, then I ask ... I find that one get*  
662 *very good help many times of fellow human beings” (P1, male)*

663 *“... a very good way to get through a forest is with support of a rope, a short, uh,*  
664 *yes, one (1) meter of rope, which is fixed to the companion's backpack in front of you, for*  
665 *example and then I have one end, and then we go with walking-sticks. Then I have the rope in*  
666 *one hand, uh, and make sure the rope is stretched, because as soon as it goes down, I stop,*  
667 *because otherwise you will collide ” (P2, female)*

668 *“I don't run to the bus, I walk, and if I miss it, I take the next one, I don't want to*  
669 *stumble in my life. In contrast, I take it easy and safe.” (P5, female)*

670 *“Well then I have to be there a long time in advance to be able to find that*  
671 *address I am looking for. And sometimes, if it is close then I go there the day before to see*  
672 *how it looks like” (P8, female)*

673 *“Of course, I try to go shopping in the mornings when there are limited people*  
674 *out there ... I only go to the gym during daytime, it would never occur to me to go there on*  
675 *weekends or evenings of course” (P9, male)*

676 *“... then I usually ask if it is okey that I go along with a person” (P14, male)*

677

## 678 **Discussion**

679 The present study is performed with a qualitative methodology with aspects of daily life and  
680 need of support from the perspective of participants with dual sensory loss which is not  
681 common in this kind of research. As reported in Backenroth & Ahlner [34] studies with a  
682 qualitative approach in audiological research has first been reported in the late 1990's.

683 The aim of the present study was to describe experiences of disabilities and factors affecting  
684 daily life with dual sensory loss. The content analysis resulted in 22 categories and six sub-  
685 themes. During processing the categories, two main themes emerged as *Isolation* and *Ability*  
686 *to control one's own daily life*.

687 Many participants experienced the lack of control and independence over their own lives.  
688 Isolation appeared in various categories.

689 Interestingly, the participants, during these interviews, realised that they suffered a  
690 combination of sensory loss and not just two separate disabilities.

691

### 692 ***Result discussion***

693 Participants in the study had suffered from their disabilities for various lengths of time, some  
694 were born with vision or hearing impairment, and some acquired later in life.

695 The present study had an even number of participants in terms of gender, but a wide range of  
696 participants' demographics, such as types of hearing loss and visual impairment, and causes  
697 of the combination. Previous national studies in this area have often examined patients with  
698 combined hearing and vision disabilities in patients with solely Usher syndrome [25, 52, 53].

699 In the present study only four (4) out of 14 suffered from Usher syndrome.

700 In sub-theme *Contact arenas*, the Deafblind-team unit demonstrates to deliver an excellent  
701 and successful care. The Deafblind-team unit handles with many dimensions, not only with  
702 the individual but with the whole family. They work individually, in groups and in teams,  
703 interprofessional with hearing and vision educators, counsellors, psychologists and consulted  
704 doctors. They have continuity when they call patients, and all patients have two contact  
705 persons at the Deafblind-team unit. They offer e.g. conversation groups with older couples,  
706 sign language, stress management, fitness group, white cane training, and cooking group.

707 The present study emphasizes the importance of having related persons and friends since you  
708 are dependent on another person to read mail and newspaper, manage your finances, visit a  
709 doctor, go for a walk, skiing, swimming, or shopping, take a bus and subway, or drive a car as  
710 some of them could do before. Many mentioned mail readings as a major problem, as well as  
711 moving in traffic. Someone also mentioned, that added to having related persons and friends  
712 there was a problem of misunderstanding even among those closest to them.

713 Many of the participants were active members in various types of associations regardless of  
714 their disabilities.

715 The sub-theme *Time perspective* with category Life history provides the basis for how one  
716 looks at one's self-image and how to deal with one's problems in life. The vision for future  
717 indicated some concern about further impaired hearing, the lack of independence, isolation,  
718 hopelessness, but also acceptance and gratitude for the little sight or hearing one has left.

719 Surprisingly, the Combination's effects and Limitation in sub-theme *Disability*, demonstrated  
720 that most of the participants did not think of their vision and hearing impairment as a  
721 combined disability. One possible reason may be that the disabilities often progressed  
722 independent of each other. Demographic data shows that the hearing impairment existed in  
723 some cases from birth, some participants had the vision impairment when they were born, and



724 most of the participants acquired disabilities in childhood or later in life. When a person is  
725 coping to one disability and the other is added and gets worse and worse, then it was  
726 perceived as a more problematic situation. Many participants declared the content *isolation* as  
727 a huge problem. The second content having *control* and influence *over one's own life*  
728 promotes self-confidence and self-esteem. Contrary to this lack of control and influence over  
729 one's own living conditions may result in feelings of exclusion and impotence [54]. The  
730 combined hearing and vision disabilities limit in all aspects of daily life e.g., reading, moving  
731 around, shopping, and participants announce that they need support in daily life activities.  
732 Persons with dual sensory loss are depending on a person by her/his side in many situations.  
733 Our results indicate that the deafblindness create even more isolation than having one  
734 disability, and that the greater the disabilities are the greater the challenges are.

735 Sub-theme *Challenges* harbours many categories. To avoid misunderstandings, there is a need  
736 of more information to the environment about disabilities. Participants highlights that dual  
737 sensory loss takes energy and that there is a sadness beneath the surface related to things you  
738 can no longer do. This study identified, similar to Hallberg [55] showed, the importance of  
739 accepting one's disability and integrating it with one's self-image in order to feel as valuable  
740 as other individuals.

741 In sub-theme *Needs* appeared the importance of continuity in health care and the positive  
742 routines at the Deafblind-team unit as they perform an annual appointment for every patient.  
743 It emerged that it is important with contacts with the surrounding world to avoid isolation and  
744 to gain accessibility in society. Radio and access to social media demonstrated an important  
745 area to be able to obtain information. All participants had various kinds of technical tools for  
746 their hearing and vision impairment. Another tool, the white cane, was discovered as the  
747 “most loyal companion”, but it took time for some participants to identify that. It turned out

748 that the white cane implies two sides of a coin; help and stigma. Some participants said that  
749 they felt vulnerable in certain situations and did not want to show their surroundings that they  
750 had vision problems. At the same time, the white cane was very helpful. The Deafblind-team  
751 unit has white cane training, which the participants appreciate because the white cane is of  
752 great importance and should never be underestimated. The present study indicates similar  
753 findings as Ehn et al [53] that to accustom to the white cane takes time and that the experience  
754 of using it becomes more positive over time.

755 The companion service will promote equality in living conditions and full participation in  
756 society according to The Swedish National Board of Health and Welfare (Socialstyrelsen)  
757 [40]. Unfortunately, the companion services support in Sweden has become much more  
758 difficult to receive with many limitations regarding the length of support time one can get.  
759 Offering a few hours of support per week for this patient group does not meet with the  
760 statement described above. Only three of the 14 participants came with companion service  
761 person to our interviews, and one was accompanied by a relative. To increase accessibility in  
762 the society, it is important to offer adequate opportunity for support through companion  
763 service, otherwise the requirements of the legislation are not met with this patient group.

764 The sub-theme *Coping strategies* showed a high degree of invention of the participants both  
765 at home and abroad. The study confirms that people strive to be considered as normal as  
766 possible, despite their disability, by using different coping strategies in similar ways as  
767 previous studies have shown [34, 55]. Many participants asked for support when they were  
768 outside home, and they used companion service when possible. One of them used a rope  
769 attached to a person in front of him/her and with help of the stretch of the rope, could walk or  
770 jog in different terrains or swim in the pool. One strategy could be to provide information to

771 the public of the importance of presenting oneself every time one is near to a person with a  
772 vision impairment and not to speak from another room to a person with a hearing impairment.  
773 The researchers' preconceived notion was that the participants did not perceive their vision  
774 and hearing impairment as a combination. Many described more likely a separate vision and  
775 hearing impairment. Our “pre-understanding” was that patients might have various challenges  
776 due to their dual disability, which can cause various expressions. The interviews showed  
777 which kind of difficulties patients with dual sensory loss had, and with what kind of strategies  
778 they master these difficulties. In light of patient’s experiences, the findings showed even how  
779 positive, energetic, committed, and active participants were in the present study.

780 The origin of the health and the salutogenic theory by Antonovsky that emphasizes the human  
781 ability to cope with difficulties were present in all participants in the present study [56, 57].  
782 The focus is not only on illness / functional ability but also on the ability to handle  
783 difficulties. This sense of coherence was observed in how participants managed their daily  
784 lives using many strategies.

785

### 786 *Strengths and limitations*

787 The qualitative design was employed, and inductive content analysis was conducted as an  
788 appropriate technique to describe verbal phenomena [42]. The qualitative study with  
789 interviews describes and increases the understanding of the research questions and the reality  
790 being studied.

791 In qualitative research the trustworthiness includes credibility, transferability and  
792 dependability [45] and the study strengthened these by involving four authors in analysis of  
793 the meaning units and codes, categorisation and finally the main themes. Audio recorded  
794 interviews and authentic citations increase the trustworthiness of the study [41]. The

795 researchers describes data collection and analysis process to facilitate transferability [45], and  
796 by representative quotations [45]. The present study used qualitative method with semi-  
797 structured open-ended questions. A qualitative research strategy opens up the possibilities for  
798 the researcher's own bias. To reduce the researcher's own bias in the study the transcribed  
799 text was read several times by the authors to reach consensus.

800 All interviews except one, were conducted in a hospital setting, which minimizes the source  
801 of error depending on varying environments.

802 In the study, both interviewers participated together in each meeting with the participants.  
803 Every other interview they changed acting roles and were either interviewer or observer. This  
804 was perceived as a strength to gain insight and knowledge about each interview situation. The  
805 observation notes, while one of the interviewers observed the other interviewer, reflected each  
806 interview, and the observations were discussed between them. This method was used in order  
807 to give feedback to each other, and this manner also improved the interview technique by  
808 time. The researchers did not feel that the participants were disturbed by this method because  
809 the other sat quiet during the interview after introducing herself to the participant.

810 Three of the participants did not return their consent form to quote verbatim in text. The  
811 researchers do not know if these three had understood the meaning of the request or if they  
812 really did not want their quote to be used which were sent by letter after the interviews were  
813 completed. This fact made the study unable to reproduce these three participants' quotes.  
814 Nevertheless, these quotes were interpreted and contributed to the study.

815

## 816 **Conclusions**

817 One of the key words for the study is that the combination of vision and hearing impairment  
818 evokes isolation. The independence to spontaneous doing things and get outside door, is  
819 limited because they need support of other people in everyday life. At the same time, the  
820 participants show creativity, willingness to manage themselves, exhibit a positive life  
821 philosophy, see opportunities, and that most things can be performed but in a variety of ways.  
822 The experiences identified among participants, in the present study, are positive and they  
823 want to be as equal as everyone else, and to have control over their own lives.

824 The study indicates that it is the combination of dual loss that makes difficulties in daily life  
825 by causing, for example, isolation. How can health care professionals, meet the needs of this  
826 patient group? There is a great lack of understanding in society for this combination of vision  
827 and hearing impairment and therefore there is an urgent need of more information and  
828 education about dual sensory loss in the society.

829 One recommendation is that meeting an individual with a combined hearing and vision  
830 impairment should immediately alert the health care as these patients belong to a extremely  
831 vulnerable group. Furthermore, the community-organized companion services should be  
832 investigated and reviewed to meet with the needs of this patient group.

833

## 834 **Supporting information**

835 S1 Appendix. Key informant interview guide. (PDF)

836

## 837 Acknowledgments

838 We are grateful to all participants who took part in interviews in this study and shared their  
839 experiences, and to our colleagues who helped with recruitment of participants.

840 We also thank Adrian Taheri for transcription.

841

## 842 Disclosure statement

843 The authors declare that they have no conflicts of interest to disclose. The authors alone are  
844 responsible for the content and writing of the paper.

845

## 846 References:

- 847 1. Strawbridge WJ, Wallhagen MI, Shema SJ, Kaplan GA. Negative consequences of  
848 hearing impairment in old age: a longitudinal analysis. *The Gerontologist*. 2000;40(3):320-6. Epub  
849 2000/06/15. doi: 10.1093/geront/40.3.320. PubMed PMID: 10853526.
- 850 2. GBD. Hearing loss prevalence and years lived with disability, 1990-2019: findings from  
851 the Global Burden of Disease Study 2019. *Lancet* (London, England). 2021;397(10278):996-1009.  
852 Epub 2021/03/15. doi: 10.1016/s0140-6736(21)00516-x. PubMed PMID: 33714390; PubMed Central  
853 PMCID: PMC7960691.
- 854 3. Statistiska Centralbyrån. Undersökningar av levnadsförhållanden (ULF/SILC) 2015-2016  
855 [2019 July 04]. Available from:  
856 [http://www.statistikdatabasen.scb.se/pxweb/sv/ssd/START\\_LE\\_LE0101\\_LE0101H/LE0101H13/ta](http://www.statistikdatabasen.scb.se/pxweb/sv/ssd/START_LE_LE0101_LE0101H/LE0101H13/table/tableViewLayout1/)  
857 [ble/tableViewLayout1/](http://www.statistikdatabasen.scb.se/pxweb/sv/ssd/START_LE_LE0101_LE0101H/LE0101H13/table/tableViewLayout1/).
- 858 4. Q-ORL. Swedish Quality Register of Otorhinolaryngology. Nationellt kvalitetsregister  
859 för öron-, näs- och halssjukvård. 1997 [2022 Mars 09]. Available from: [www.entqualitysweden.se](http://www.entqualitysweden.se).
- 860 5. Löfvenberg C, Carlsson PI, Barrenäs ML, Skagerstrand Å, Simic D, Carlsson J, et al.  
861 Prevalence of severe-to-Profound hearing loss in the adult Swedish population and comparison with  
862 cochlear implantation rate. *Acta oto-laryngologica*. 2022;1-5. Epub 2022/06/01. doi:  
863 10.1080/00016489.2022.2073388. PubMed PMID: 35635283.
- 864 6. Clark JG. Uses and abuses of hearing loss classification. *Asha*. 1981;23(7):493-500.  
865 Epub 1981/07/01. PubMed PMID: 7052898.
- 866 7. WHO. World Health Organization. Grades of hearing impairment 1991 [2019 July 03].  
867 Available from:  
868 [https://apps.who.int/iris/bitstream/handle/10665/58839/WHO\\_PDH\\_91.1.pdf?sequence=1&isAllow](https://apps.who.int/iris/bitstream/handle/10665/58839/WHO_PDH_91.1.pdf?sequence=1&isAllowed=y)  
869 [ed=y](https://apps.who.int/iris/bitstream/handle/10665/58839/WHO_PDH_91.1.pdf?sequence=1&isAllowed=y).
- 870 8. Desrosiers J, Wanet-Defalque MC, Temisjian K, Gresset J, Dubois MF, Renaud J, et al.  
871 Participation in daily activities and social roles of older adults with visual impairment. *Disability and*  
872 *rehabilitation*. 2009;31(15):1227-34. Epub 2009/10/06. PubMed PMID: 19802927.
- 873 9. Schilling OK, Wahl HW, Horowitz A, Reinhardt JP, Boerner K. The adaptation dynamics  
874 of chronic functional impairment: what we can learn from older adults with vision loss. *Psychology*  
875 *and aging*. 2011;26(1):203-13. Epub 2010/12/15. doi: 10.1037/a0021127. PubMed PMID: 21142375.

- 876 10. GBD. Trends in prevalence of blindness and distance and near vision impairment over  
877 30 years: an analysis for the Global Burden of Disease Study. *The Lancet Global health*.  
878 2021;9(2):e130-e43. Epub 2020/12/05. doi: 10.1016/s2214-109x(20)30425-3. PubMed PMID:  
879 33275950; PubMed Central PMCID: PMC7820390.
- 880 11. Swedish Eye Centres (Syncentralerna). Information about vision impairment 2019  
881 [2021 May 06]. Available from: <https://www.srf.nu/>.
- 882 12. World Health Organization (WHO). The International Classification of Diseases-11.  
883 Blindness and vision impairment 2018 [2019 July 10]. Available from: [https://www.who.int/en/news-](https://www.who.int/en/news-room/fact-sheets/detail/blindness-and-visual-impairment)  
884 [room/fact-sheets/detail/blindness-and-visual-impairment](https://www.who.int/en/news-room/fact-sheets/detail/blindness-and-visual-impairment).
- 885 13. World Health Organization (WHO). ICD-11 for Mortality and Morbidity Statistics.  
886 Version: 04/2019. Vision impairment including blindness [2019 July 10]. Available from:  
887 <https://icd.who.int/browse11/l-m/en#/http://id.who.int/icd/entity/1103667651>.
- 888 14. Dalton DS, Cruickshanks KJ, Klein BE, Klein R, Wiley TL, Nondahl DM. The impact of  
889 hearing loss on quality of life in older adults. *The Gerontologist*. 2003;43(5):661-8. Epub 2003/10/23.  
890 PubMed PMID: 14570962.
- 891 15. Heine C, Browning CJ. Communication and psychosocial consequences of sensory loss  
892 in older adults: overview and rehabilitation directions. *Disability and rehabilitation*. 2002;24(15):763-  
893 73. Epub 2002/11/20. doi: 10.1080/09638280210129162. PubMed PMID: 12437862.
- 894 16. WFDB. World Federation of the Deafblind. At risk of exclusion from CRPD and SDGs  
895 implementation: inequality and persons with deafblindness. 2018.
- 896 17. Turunen-Taheri S, Skagerstrand A, Hellstrom S, Carlsson PI. Patients with severe-to-  
897 profound hearing impairment and simultaneous severe vision impairment: a quality-of-life study.  
898 *Acta oto-laryngologica*. 2017;137(3):279-85. Epub 2016/09/24. doi:  
899 10.1080/00016489.2016.1229025. PubMed PMID: 27659206.
- 900 18. Förbundet Sveriges Dövblinda. Swedish Association of the Deafblind 2007, rev 2016  
901 [2021 May 06]. Available from: <http://www.fsd.org/Nordisk-definitionavdovblindhet.html>.
- 902 19. The Swedish National Information Centre for Deafblindness Issues. Nordic definition of  
903 deafblindness 2016 [2021 May 06]. Available from: [https://nkcdb.se/dovblindhet/fakta-om-](https://nkcdb.se/dovblindhet/fakta-om-dovblindhet/nordisk-definition/)  
904 [dovblindhet/nordisk-definition/](https://nkcdb.se/dovblindhet/fakta-om-dovblindhet/nordisk-definition/).
- 905 20. Socialdepartementet. Statens offentliga utredningar. Teckenspråk och teckenspråkiga  
906 : översyn av teckenspråkets ställning : slutbetänkande Stockholm: Fritze; 2006 [2021 May 06].  
907 Available from: [https://www.regeringen.se/rattsliga-dokument/statens-offentliga-](https://www.regeringen.se/rattsliga-dokument/statens-offentliga-utredningar/2006/05/sou-200654/)  
908 [utredningar/2006/05/sou-200654/](https://www.regeringen.se/rattsliga-dokument/statens-offentliga-utredningar/2006/05/sou-200654/).
- 909 21. Lundin E, Widén SE, Wahlqvist M, Anderzén-Carlsson A, Granberg S. Prevalence,  
910 diagnoses and rehabilitation services related to severe dual sensory loss (DSL) in older persons: a  
911 cross-sectional study based on medical records. *International journal of audiology*. 2020;59(12):921-  
912 9. Epub 2020/07/07. doi: 10.1080/14992027.2020.1783003. PubMed PMID: 32628050.
- 913 22. National Knowledge Centre for Deafblind issues. Nationellt kunskapscenter för  
914 Dövblindfrågor. Prevalence of deafblindness 2018 [2021 May 06]. Available from:  
915 <https://nkcdb.se/dovblindhet/fakta-om-dovblindhet/forekomst/>.
- 916 23. Sadeghi AM, Cohn ES, Kimberling WJ, Halvarsson G, Moller C. Expressivity of hearing  
917 loss in cases with Usher syndrome type IIA. *International journal of audiology*. 2013;52(12):832-7.  
918 Epub 2013/10/29. doi: 10.3109/14992027.2013.839885. PubMed PMID: 24160897.
- 919 24. Mathur P, Yang J. Usher syndrome: Hearing loss, retinal degeneration and associated  
920 abnormalities. *Biochimica et biophysica acta*. 2015;1852(3):406-20. Epub 2014/12/08. doi:  
921 10.1016/j.bbadis.2014.11.020. PubMed PMID: 25481835; PubMed Central PMCID: PMC4312720.
- 922 25. Sadeghi M, Kimberling W, Tranebjørg L, Möller C. The prevalence of Usher Syndrome  
923 in Sweden: a nationwide epidemiological and clinical survey. *Audiological Medicine*. 2004;2(4):220-8.  
924 doi: 10.1080/16513860410003093.

- 925 26. Brannstrom KJ, Basjo S, Larsson J, Lood S, Lunda S, Notsten M, et al. Psychosocial work  
926 environment among Swedish audiologists. *International journal of audiology*. 2013;52(3):151-61.  
927 Epub 2012/12/12. doi: 10.3109/14992027.2012.743045. PubMed PMID: 23216266.
- 928 27. Optician Association. Optikerförbundet 2021 [2021 May 06]. Available from:  
929 <https://optikerforbundet.se/>.
- 930 28. Förbundet Sveriges Dövblanda. Swedish Association of the Deafblindness.  
931 Dövblandteam 2019 [2019 July 11]. Available from: <http://www.fsd.org/doevblindteam.html>.
- 932 29. MFD. Swedish Agency for Participation. Myndigheten för delaktighet (MFD). The UN  
933 Convention on the Rights of Persons with Disabilities. FN:s konvention om rättigheter för personer  
934 med funktionsnedsättning. 2009 [2021 May 06]. Available from: <https://www.mfd.se/kunskap/> and  
935 <http://www.mfd.se/delaktighet/fns-konvention/>.
- 936 30. Regeringskansliet. Government Offices of Sweden. The UN Convention on the Rights  
937 of Persons with Disabilities. SÖ 2008:26. Regeringskansliet. Konvention om rättigheter för personer  
938 med funktionsnedsättning och fakultativt protokoll. 2008 [2021 May 06]. Available from:  
939 [https://www.regeringen.se/informationsmaterial/2015/06/konvention-om-rattigheter-for-personer-  
940 med-funktionsnedsattning/](https://www.regeringen.se/informationsmaterial/2015/06/konvention-om-rattigheter-for-personer-med-funktionsnedsattning/).
- 941 31. Joge Johansson C, Edberg P-O., & Nylander G. Plus & Minus. Framgångsfaktorer och  
942 hindrande faktorer i samband med förvärvad dövblindhet. 2010 ISBN: 978-91-978034-5-8.  
943 <https://nkcdb.se/wp-content/uploads/2015/02/Plus-och-Minus.pdf>.
- 944 32. Swedish Agency for Accessible Media (MTM). Myndigheten för tillgängliga medier.  
945 2019 [2021 May 06]. Available from: <https://www.mtm.se/>.
- 946 33. Ringdahl A, Grimby A. Severe-profound hearing impairment and health-related quality  
947 of life among post-lingual deafened Swedish adults. *Scandinavian audiology*. 2000;29(4):266-75.  
948 Epub 2001/02/24. PubMed PMID: 11195947.
- 949 34. Backenroth GAM, Ahlner BH. Quality of life of hearing-impaired persons who have  
950 participated in audiological rehabilitation counselling. *International Journal for the Advancement of  
951 Counselling*. 2000;22(3):225-40. doi: 10.1023/A:1005655017175.
- 952 35. Turunen-Taheri S, Carlsson PI, Johnson AC, Hellstrom S. Severe-to-profound hearing  
953 impairment: demographic data, gender differences and benefits of audiological rehabilitation.  
954 *Disability and rehabilitation*. 2019;41(23):2766-74. Epub 2018/06/13. doi:  
955 10.1080/09638288.2018.1477208. PubMed PMID: 29893149.
- 956 36. Ehn M, Anderzén-Carlsson A, Möller C, Wahlqvist M. Life strategies of people with  
957 deafblindness due to Usher syndrome type 2a - a qualitative study. *International journal of  
958 qualitative studies on health and well-being*. 2019;14(1):1656790. Epub 2019/09/01. doi:  
959 10.1080/17482631.2019.1656790. PubMed PMID: 31470768; PubMed Central PMCID:  
960 PMC6735326.
- 961 37. Synskadades Riksförbund. Vardagstips för personer med synnedsättning. The National  
962 Association of the Visually Impaired 2017 [2021 May 06]. Available from:  
963 [https://www.srf.nu/globalassets/informationsmaterial/for-medlemmar-och-andra-  
964 synskadade/vardagstips\\_2017\\_tillganglig.pdf](https://www.srf.nu/globalassets/informationsmaterial/for-medlemmar-och-andra-synskadade/vardagstips_2017_tillganglig.pdf).
- 965 38. Sveriges Riksdag. The Social Services Act. Socialtjänstlag (2001:453) 2001 [2021 May  
966 06]. Available from: [https://www.riksdagen.se/sv/dokument-lagar/dokument/svensk-  
967 forfattningssamling/socialtjanstlag-2001453\\_sfs-2001-453](https://www.riksdagen.se/sv/dokument-lagar/dokument/svensk-forfattningssamling/socialtjanstlag-2001453_sfs-2001-453).
- 968 39. Stockholms Stad. Companion service for persons with disability. Ledsagning för  
969 personer med funktionsnedsättning. 2021 [2021 May 06]. Available from:  
970 <https://www.stockholm.se/FamiljOmsorg/funktionsnedsattning/Personligt-stod/Ledsagning/>.
- 971 40. Socialstyrelsen. Socialstyrelsen. The Swedish National Board of Health and Welfare.  
972 Ledsagning enligt LSS och SoL. 2011 [2021 May 06]. Available from:  
973 [https://www.socialstyrelsen.se/globalassets/sharepoint-dokument/artikelkatalog/ovrigt/2011-3-  
974 49.pdf](https://www.socialstyrelsen.se/globalassets/sharepoint-dokument/artikelkatalog/ovrigt/2011-3-49.pdf).



- 975 41. Patton MQ. *Qualitative Research and Evaluation Methods*. Thousand Oaks, CA: SAGE  
976 Publications; 2014.
- 977 42. Krippendorff K. *Content analysis : an introduction to its methodology*. Thousand Oaks,  
978 Calif. ;: SAGE; 2013.
- 979 43. Elo S, Kyngas H. The qualitative content analysis process. *Journal of advanced nursing*.  
980 2008;62(1):107-15. Epub 2008/03/21. doi: 10.1111/j.1365-2648.2007.04569.x. PubMed PMID:  
981 18352969.
- 982 44. Erlingsson C, Brysiewicz P. A hands-on guide to doing content analysis. *African journal  
983 of emergency medicine : Revue africaine de la medecine d'urgence*. 2017;7(3):93-9. Epub  
984 2017/09/01. doi: 10.1016/j.afjem.2017.08.001. PubMed PMID: 30456117; PubMed Central PMCID:  
985 PMC6234169.
- 986 45. Graneheim UH, Lundman B. Qualitative content analysis in nursing research: concepts,  
987 procedures and measures to achieve trustworthiness. *Nurse education today*. 2004;24(2):105-12.  
988 Epub 2004/02/11. doi: 10.1016/j.nedt.2003.10.001. PubMed PMID: 14769454.
- 989 46. Polit DF, Beck CT. Generalization in quantitative and qualitative research: myths and  
990 strategies. *International journal of nursing studies*. 2010;47(11):1451-8. Epub 2010/07/06. doi:  
991 10.1016/j.ijnurstu.2010.06.004. PubMed PMID: 20598692.
- 992 47. Malterud K. Qualitative research: standards, challenges, and guidelines. *Lancet  
993 (London, England)*. 2001;358(9280):483-8. Epub 2001/08/22. doi: 10.1016/s0140-6736(01)05627-6.  
994 PubMed PMID: 11513933.
- 995 48. Cope DG. Methods and meanings: credibility and trustworthiness of qualitative  
996 research. *Oncology nursing forum*. 2014;41(1):89-91. Epub 2013/12/26. doi: 10.1188/14.onf.89-91.  
997 PubMed PMID: 24368242.
- 998 49. Braun V, Clarke V. Using thematic analysis in psychology. *Qualitative Research in  
999 Psychology*. 2006;3(2):77-101. doi: 10.1191/1478088706qp063oa.
- 1000 50. O'Brien BC, Harris IB, Beckman TJ, Reed DA, Cook DA. Standards for reporting  
1001 qualitative research: a synthesis of recommendations. *Academic medicine : journal of the Association  
1002 of American Medical Colleges*. 2014;89(9):1245-51. Epub 2014/07/01. doi:  
1003 10.1097/acm.0000000000000388. PubMed PMID: 24979285.
- 1004 51. Tong A, Sainsbury P, Craig J. Consolidated criteria for reporting qualitative research  
1005 (COREQ): a 32-item checklist for interviews and focus groups. *International journal for quality in  
1006 health care : journal of the International Society for Quality in Health Care*. 2007;19(6):349-57. Epub  
1007 2007/09/18. doi: 10.1093/intqhc/mzm042. PubMed PMID: 17872937.
- 1008 52. Wahlqvist M, Moller C, Moller K, Danermark B. Physical and Psychological Health in  
1009 Persons with Deafblindness That Is Due to Usher Syndrome Type II. *Journal of Visual Impairment &  
1010 Blindness*. 2013;107(3):207-20. PubMed PMID: WOS:000209257700005.
- 1011 53. Ehn M, Anderzen-Carlsson A, Moller C, Wahlqvist M. Life strategies of people with  
1012 deafblindness due to Usher syndrome type 2a - a qualitative study. 2019;14(1):1656790. doi:  
1013 10.1080/17482631.2019.1656790. PubMed PMID: 31470768.
- 1014 54. Regeringskansliet. Government Offices of Sweden. Good and equal health - a  
1015 developed one health policy. Proposition 2017/18:249. Regeringskansliet. God och jämlik hälsa – en  
1016 utvecklad folkhälsopolitik 2017 [2019 July 12]. Available from:  
1017 [https://www.regeringen.se/498282/contentassets/8d6fca158ec0498491f21f7c1cb2fe6d/prop.-  
1018 2017\\_18\\_249-god-och-jamlik-halsa--en-utvecklad-folkhalsopolitik.pdf](https://www.regeringen.se/498282/contentassets/8d6fca158ec0498491f21f7c1cb2fe6d/prop.-2017_18_249-god-och-jamlik-halsa--en-utvecklad-folkhalsopolitik.pdf).
- 1019 55. Hallberg LR-M. Stigmatisering, coping och handikappupplevelse: Intervjuer med  
1020 medelålders personer med förvärvade hörselskador. *Nordic Journal of Nursing Research*. 1996;16:39  
1021 - 45.
- 1022 56. Antonovsky A. *Health, stress, and coping*. San Francisco: Jossey-Bass; 1979.
- 1023 57. Antonovsky A. *Unraveling the mystery of health: How people manage stress and stay  
1024 well*. San Francisco, CA, US: Jossey-Bass; 1987. xx, 218-xx, p.

1025

| <b>Grade of impairment</b>                        | <b>Corresponding audiometric ISO value</b> | <b>Performance</b>                                               |
|---------------------------------------------------|--------------------------------------------|------------------------------------------------------------------|
| <b>0 - No impairment</b>                          | 25 dB or better (better ear)               | No or very slight hearing problems. Able to hear whispers.       |
| <b>1 - Slight impairment</b>                      | 26-40 dB (better ear)                      | Able to hear and repeat words spoken in normal voice at 1 meter. |
| <b>2 - Moderate impairment</b>                    | 41-60 dB (better ear)                      | Able to hear and repeat words spoken in raised voice at 1 meter. |
| <b>3 - Severe impairment</b>                      | 61-80 dB (better ear)                      | Able to hear some words when shouted into better ear.            |
| <b>4 - Profound impairment including deafness</b> | 81 dB or greater (better ear)              | Unable to hear and understand even a shouted voice.              |

Figure 1

| Category                     | Presenting distance visual acuity       |                                                                  |
|------------------------------|-----------------------------------------|------------------------------------------------------------------|
|                              | Worse than:                             | Equal to or better than:                                         |
| 0 No vision impairment       |                                         | 6/12<br>5/10 (0.5)<br>20/40                                      |
| 1 Mild vision impairment     | 6/12<br>5/10 (0.5)<br>20/40             | 6/18<br>3/10 (0.3)<br>20/70                                      |
| 2 Moderate vision impairment | 6/18<br>3/10 (0.3)<br>20/70             | 6/60<br>1/10 (0.1)<br>20/200                                     |
| 3 Severe vision impairment   | 6/60<br>1/10 (0.1)<br>20/200            | 3/60<br>1/20 (0.05)<br>20/400                                    |
| 4 Blindness                  | 3/60<br>1/20 (0.05)                     | 1/60*                                                            |
| 6 Blindness                  | 20/400 No light perception              | 1/50 (0.02)<br>5/300 (20/1200) or counts fingers (CF) at 1 metre |
| 5 Blindness                  | 1/60*<br>1/50 (0.02)<br>5/300 (20/1200) | Light perception                                                 |
| 6 Blindness                  | No light perception                     |                                                                  |

Figure 2

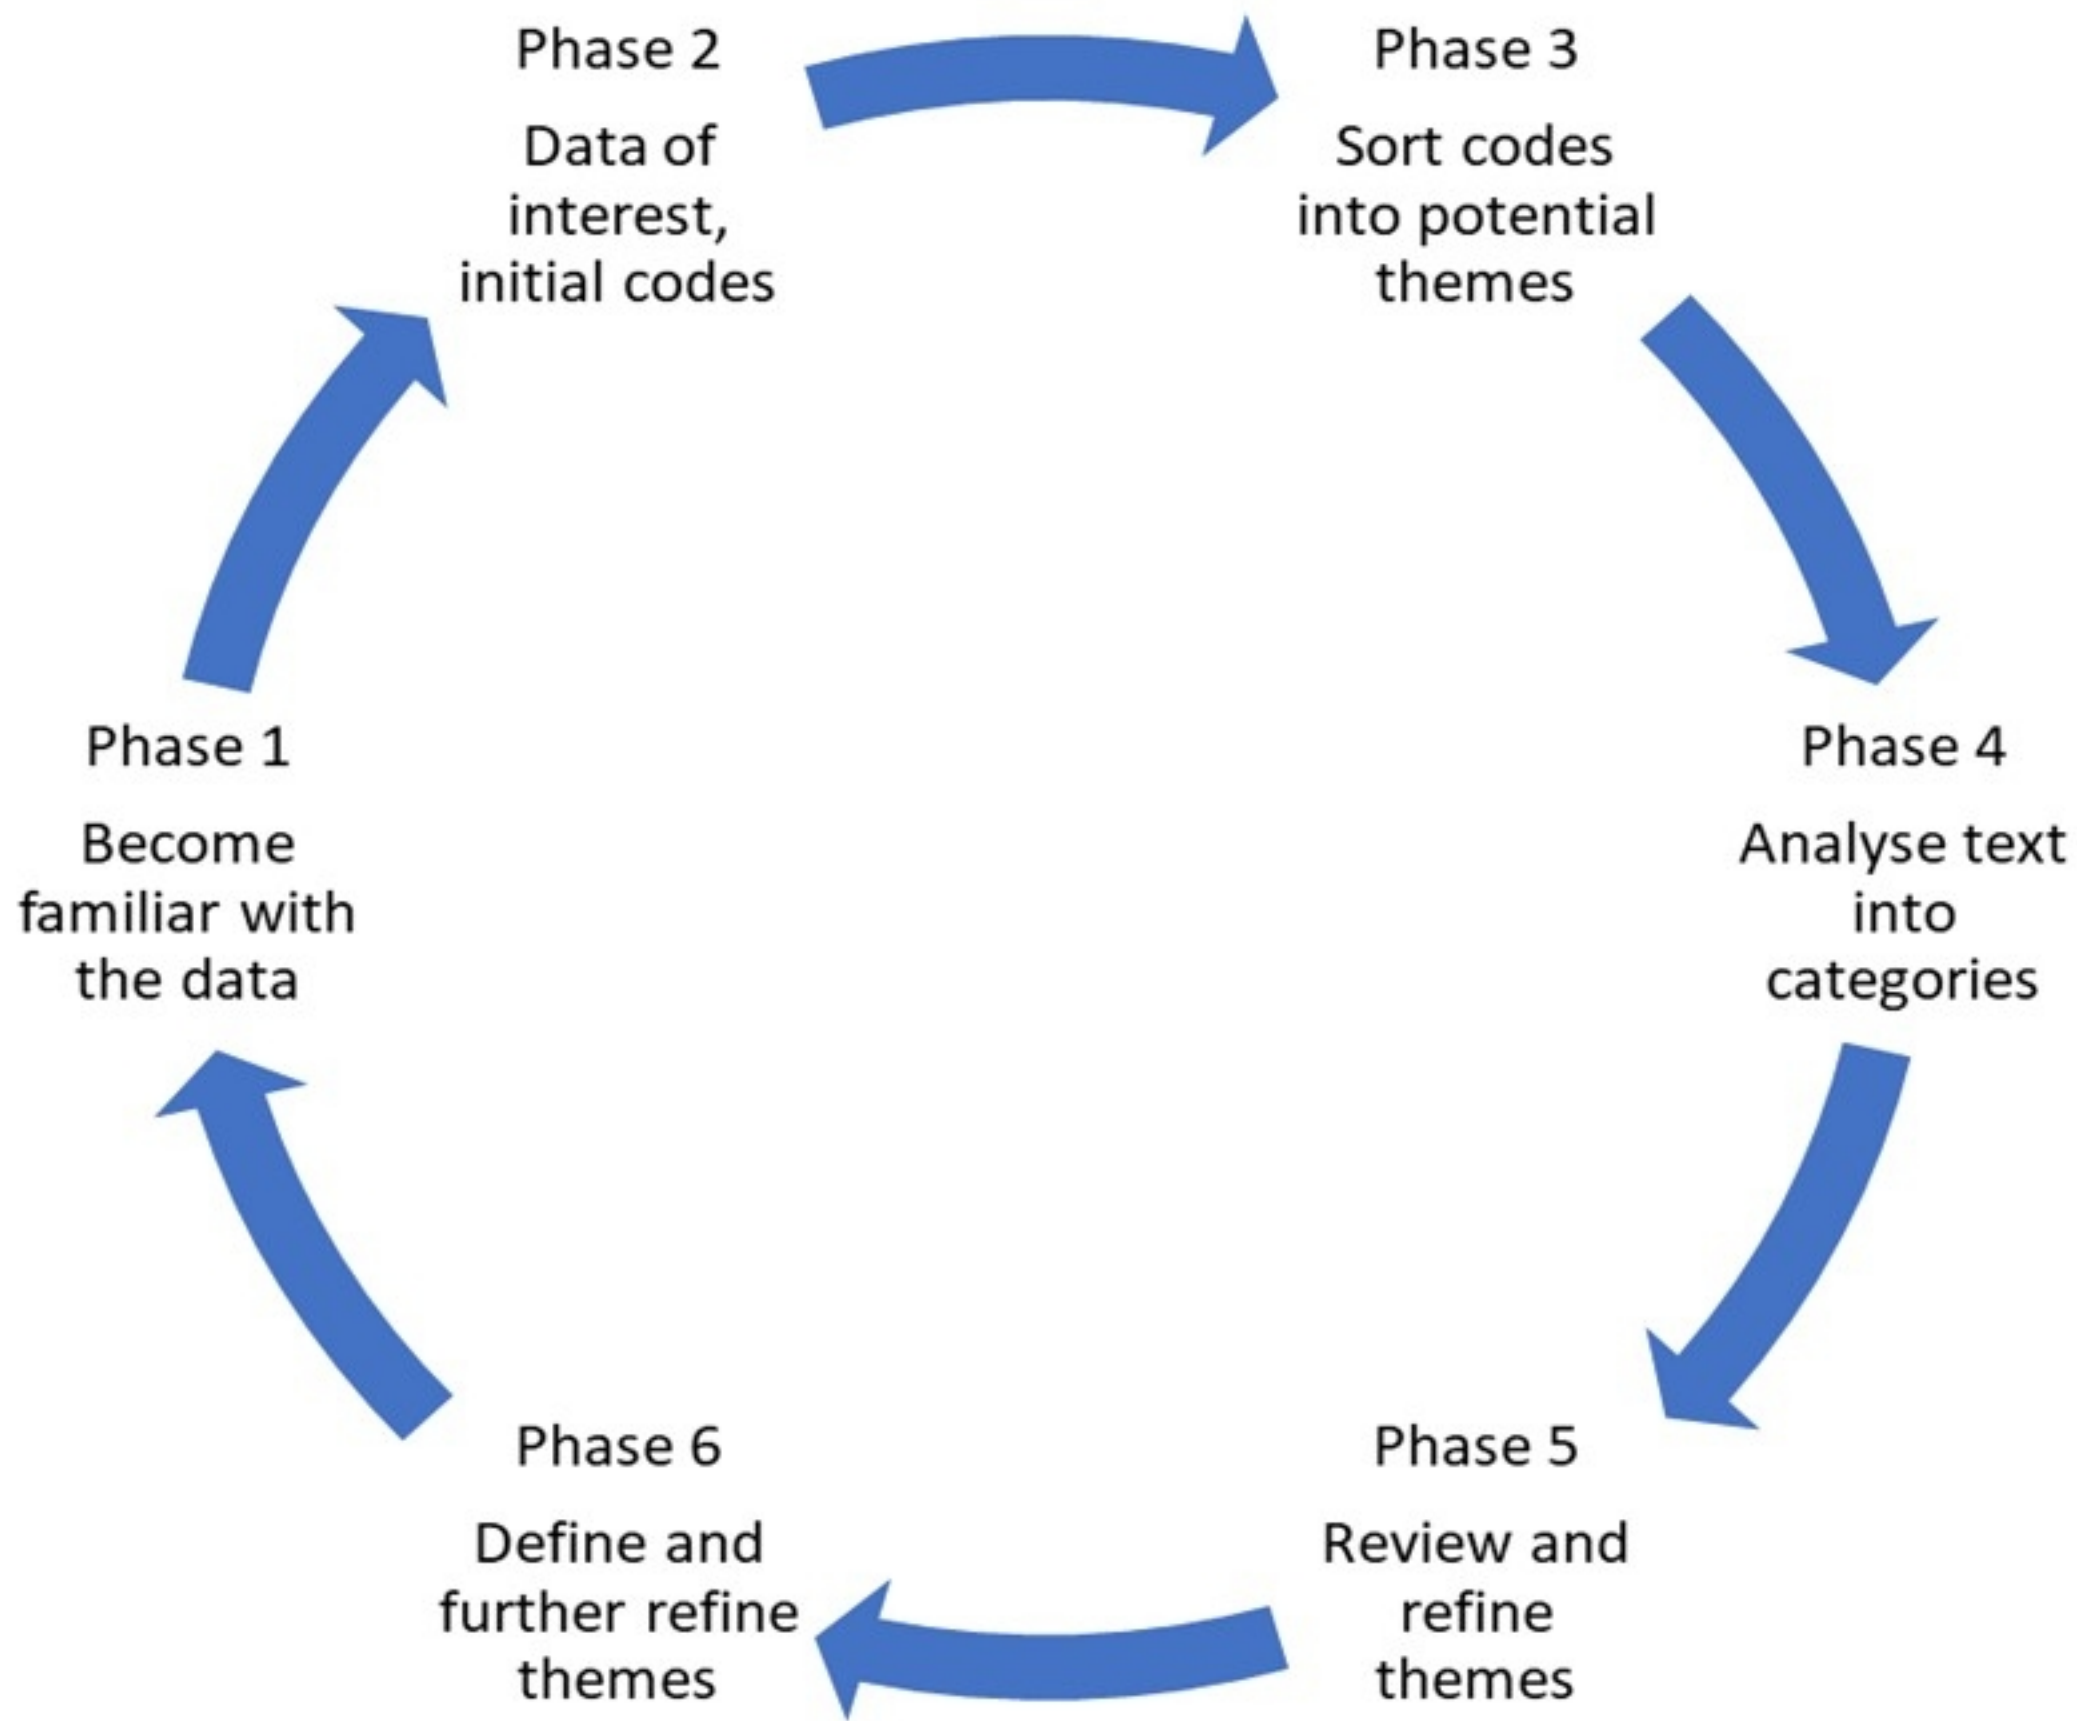

Figure 3

## Interview areas

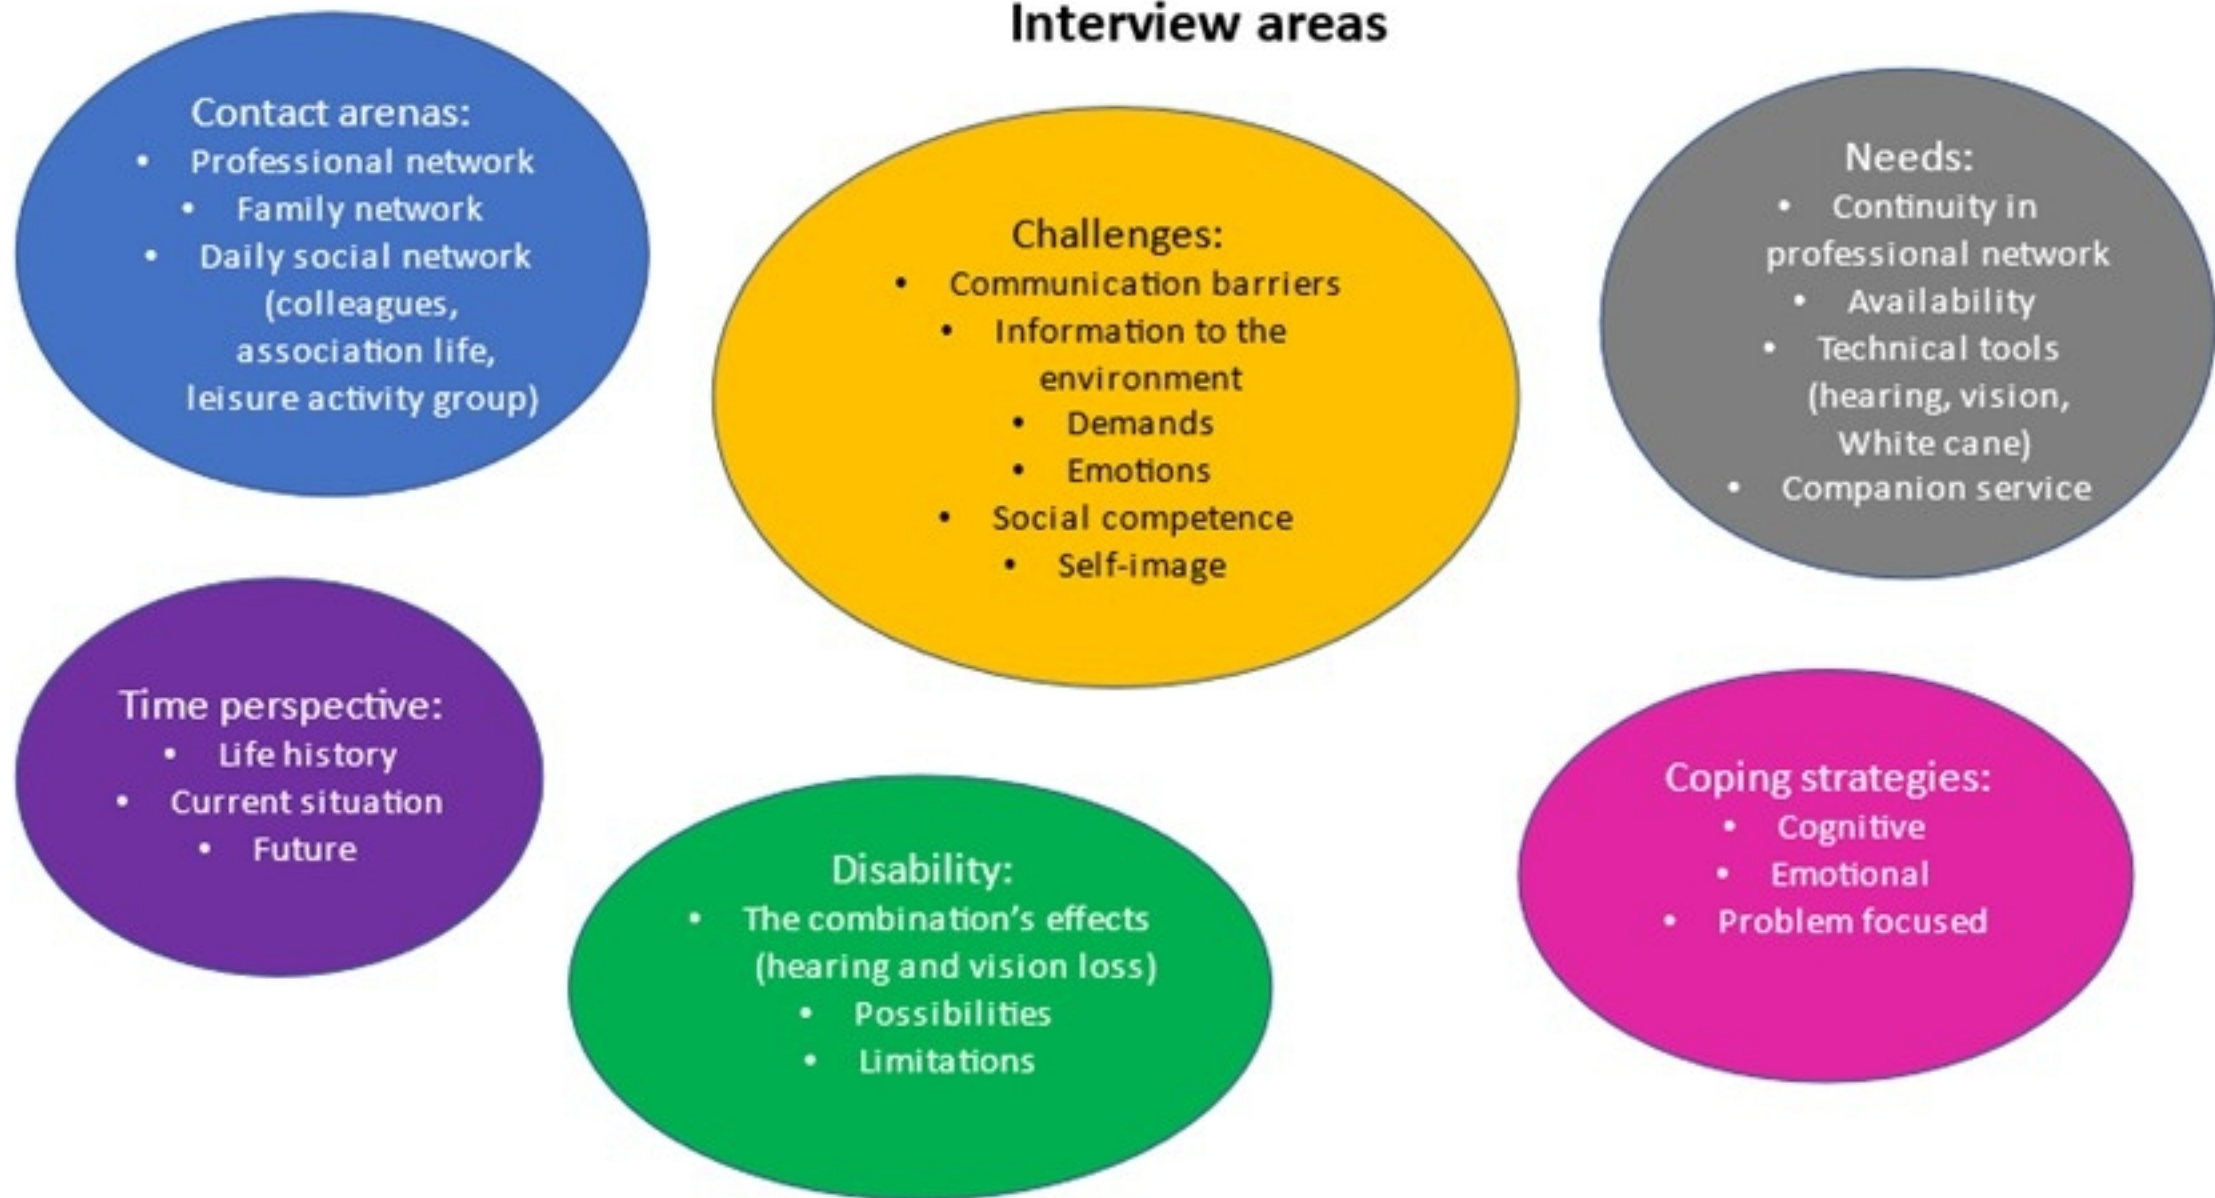

Figure 4
